1 **Song complexity in relation to repertoire size and phonological syntax in the breeding**  
2 **song of Purple Sunbird**

3 Sonam Chorol and Manjari Jain\*

4 Indian Institute of Science Education and Research Mohali, Punjab, India

5 \*Corresponding Author

6 Address correspondence to:

7 Manjari Jain

8 Department of Biological Sciences,

9 Indian Institute of Science Education and Research, Mohali,

10 Punjab 140306, India

11 [manjari@iisermohali.ac.in](mailto:manjari@iisermohali.ac.in)

12

13

14 **Abstract**

15 There are multiple measures for bird song complexity such as repertoire size, phonological or  
16 compositional syntax and complex vocal mechanism (CVM). We examined these in an old-  
17 world passerine, Purple Sunbird. First, we identified and acoustically characterised the  
18 repertoire size (of notes and phrases). We then assessed positional fidelity and ordering of  
19 notes within phrases. We found 23 distinct notes by aural-visual inspection of spectrograms  
20 which was validated using a Classification and Regression Tree based on 5 acoustic  
21 parameters. These notes combined in different iterations to form 30 different phrases.  
22 Phrases comprised of an overall structure with an introductory note (prefix) at the onset,  
23 followed by notes occurring at specific positions within the phrase body, and terminated with  
24 a trill (suffix syllable(s)). Prefix was present in 93% of phrases whereas suffix syllable(s)  
25 occurred in 27% of phrases only. We found that notes exhibited positional fidelity and  
26 combined in specific order to form a phrase. This is indicative of underlying phonological  
27 syntax that limits the ways in which notes combine to form phrase and offers insights to song  
28 complexity. Finally, we found that suffix syllables exhibit the presence of mini-breath (very  
29 short inter-note interval) which are known to be produced by CVM.

30 **Keywords:** Complex communication, sexy syllable, mini-breath, syntax, repertoire

## 31 **Introduction**

32 The total set of vocalizations that a species possesses and uses in different behavioural  
33 contexts is regarded as the vocal repertoire of a species (Searcy 1992). A large vocal  
34 repertoire depicts higher complexity in communication (Blumstein and Armitage 1997;  
35 McComb and Semple 2005). This phenomenon has been studied extensively in primates as  
36 well as in avian species (Range and Fischer 2004; Gustison et al. 2012). Structural  
37 complexity of acoustic signals exists not only in the variety of vocalizations but also in the  
38 manner in which vocalizations are organised and composed (Hailman and Ficken 1986). In  
39 avian vocalizations the smallest acoustic unit is referred to as a ‘note’ or ‘element’ which can  
40 combine, sometimes following different ordering rules, to form higher order vocal units  
41 called ‘phrase’. Finally, songs can be composed of repetition of a single element (note) or  
42 phrases (the same or different kind).

43 A phrase may be composed of a single note repeated multiple times or different notes  
44 occurring in a defined sequence. Moreover, notes may be shared between two or more  
45 phrases (Kroodsma 1977) and construction of phrases may follow certain patterns. The  
46 combinatorial rule that governs the construction of the signal from subset of signals is termed  
47 as syntax and it could be compositional or phonological syntax. The rules for arranging  
48 smaller meaningful units into a higher meaningful signal is called compositional syntax  
49 (Berwick et al. 2011). Altering this sequence may change the meaning of the signal (Berwick  
50 et al. 2011). The presence of compositional syntax is well known in human language where  
51 meaningful signalling units ‘words’ combines to form a higher meaningful signal ‘phrase’. In  
52 avian systems, the presence of the same is reported where ‘alert call’ and ‘recruitment call’  
53 combine to form ‘mobbing call’ (Suzuki et al. 2016; Engesser et al. 2016). On the other  
54 hand, bird song is a combination of meaningless units (notes) into phrases which too do not  
55 have a defined meaning. However, the notes may combine in a defined and non-random  
56 manner to build the phrase. Thus, the construction of song phrases may follow a  
57 combinatorial rule thereby exhibits a phonological syntax (Berwick et al. 2011). Moreover,  
58 bird song comprises of phrases and each phrase may be initiated with an introductory note(s)  
59 - a stereotypic note (s) which is produced at the onset of the song phrase, followed by series  
60 of notes, structurally similar or distinct, which form the main component of a phrase (phrase  
61 body) (Williams 2004; Roach et al. 2012; Nelson and Soha 2004). A song can end with a  
62 terminal trill that includes a series of rapidly produced notes (Nelson and Soha 2004). The

63 ordering of notes within a phrase following a non-random positional occurrence is indicative  
64 of phonological syntax and is another aspect of structural complexity.

65 Furthermore, song complexity also depends upon different vocal mechanisms. For instance,  
66 some birds can produce complex vocalizations with two temporally overlapping notes of  
67 different frequencies. These complex vocalizations are produced using both sides of the  
68 syrinx by expiring half air from one side of the syrinx at a certain frequency and the other  
69 half from the other side at a different frequency (Suthers 2004). These notes are separated by  
70 a short time interval (< 20 ms) known as a ‘mini-breath’. The production of such a syllable  
71 (acoustic unit composed of 2-3 notes) is expected to require precise bilateral motor  
72 coordination within the syrinx and between various muscles (Suthers 2004; Suthers et al.  
73 2012).

74 In this study, we examined song complexity in an Old-World passerine, Purple Sunbird  
75 (*Cinnyris asiaticus*). It belongs to the family Nectariniidae and occurs in West Asia,  
76 throughout the Indian subcontinent and into Southeast Asia (Ali and Ripley 1983). Purple  
77 Sunbirds are sexually dimorphic. Females are “olive brown dorsally with a yellowish  
78 underside whereas eclipse (nonbreeding) males have a distinct median line down the centre  
79 of throat and breast” (Ali and Ripley 1983). Males gain bright, metallic blue-green coloured  
80 plumage during the breeding season which ranges from April-June in Northern India (Ali and  
81 Ripley 1983). During breeding season, male sings multiple song with ringing metallic notes  
82 and increases the loudness of song under noisy conditions (Singh et al. 2019). In this study,  
83 we aimed to examine the breeding song complexity of Purple Sunbird at multiple levels. The  
84 objectives were as follows: a) to determine the repertoire size in terms of notes and phrases  
85 that compose the breeding song b) to examine the presence of phonological syntax with  
86 respect to combinatorial rules underlying phrase structuring and composition and c) to  
87 investigate evidence for complex vocal mechanism (CVM) indicated by presence of ‘sexy  
88 syllables’ in the vocal repertoire.

## 89 **Methods**

### 90 **Sampling location**

91 Sampling was done during the breeding season between May-August 2017 in IISER Mohali  
92 campus (30.6650° N, 76.7300° E), Punjab. The locality is a semi-urban, subtropical region  
93 which falls under ‘Cwa’ category (climate that is variable throughout the year with a hot  
94 summer and cold, dry winter separated by a brief period of tropical monsoon) of Koppen-

95 Geiger climate classification (Kottek et al. 2006). The vegetation is predominantly grassy  
96 with intermittent canopy of dry deciduous mixed with evergreen trees including host plants  
97 such as *Callistemon linearis*, *Delonix regia*, *Hibiscus* sp., *Plumeria* sp., *Lantena camara*,  
98 *Cascabela thevetia*, *Hamelia petens*, etc.

### 99 **Song recording and analyses**

100 A total of 3026 notes and 241 phrases were analysed from the songs of Purple Sunbird  
101 recorded over four months. Recordings were made opportunistically using a solid-state  
102 recorder (Marantz PMD661-MKII; frequency response: 20 Hz – 20 kHz), connected to a  
103 super-cardioid shotgun microphone (Sennheiser ME66 with K6 PM; frequency response: 40  
104 Hz to 20 kHz), covered with a foam windscreen (Sennheiser MZW66). All vocalizations  
105 were recorded at a sampling rate of 44.1 kHz with 16-bit accuracy. All recordings were  
106 processed in Raven Pro 1.5 (Cornell Lab of Ornithology) and spectrogram generated using  
107 Hann-window with 512 window size and 50% overlap. Songs were categorised preliminarily  
108 based on aural-visual inspection and a catalogue of all note types was generated and notes  
109 were annotated as A, B, C.... W. These were then subjected to detailed acoustic analyses  
110 based on 1 temporal (note duration) and 4 spectral (frequency 5%, frequency 95%, frequency  
111 bandwidth 90% and peak frequency) parameters. Note duration was calculated as the time  
112 duration between onset and offset of a note. Frequency 5% and 95% represent frequencies  
113 that lie at 5% and 95% of the energy of a sound signal respectively and bandwidth 90% was  
114 the difference between frequency 5% and 95%. Peak frequency represents the frequency with  
115 maximum energy. Analyses of phrases was carried out by determining the note type and their  
116 respective position within the note. Phrases with similar note composition and ordering but  
117 with variation in repetition of a note type were considered as the same. This gives a  
118 conservative estimate of the repertoire size at the note and phrase level.

### 119 **Validation of classical analyses with CART**

120 To validate the repertoire size calculated based on aural-visual inspection method, note  
121 classification was performed using ‘Classification and Regression Tree’ (CART; ‘rpart’  
122 package; Therneau et al. 2018) in R 4.0.3 (R development core team 2008) following the  
123 protocol of Garland et al. 2015. We reduced the sample size to an upper limit of N=50 per  
124 note to eliminate the over-representation of notes with large sample sizes by random  
125 sampling. The data was partitioned at 3:1 as training and test data set. The splitting of nodes  
126 was based on the ‘Gini index’ which reduce the impurities at terminal nodes as it accounts for

127 probability of misclassification. It may be noted that analysis performed using CART is  
128 robust to outliers, non-normal and non-independent data (Breiman et al. 1984).

### 129 **Evidence of phonological syntax**

130 A total of 241 phrases were analysed to determine the phrase structure (presence and absence  
131 of introductory note (prefix) and terminal trill (suffix)). Moreover, underlying combinatorial  
132 rules that dictate note occurrence and ordering of notes would be indicative of phonological  
133 syntax. Towards this, we examined positional fidelity of notes by calculating the frequency of  
134 occurrence of each note on a specific position in phrase. We then plotted a heat matrix (using  
135 *r* package *heatmapply*; Galili et al. 2017) that depicts the probability of occurrence of every  
136 note in every possible position within a phrase. This was then compared to a null matrix to  
137 examine if the ‘observed’ probability of occurrence of notes in specific positions is non-  
138 random. Towards this we generated 100 matrices where the position of every note was  
139 randomly assigned within a phrase. The averaged value of this was then used to generate a  
140 null matrix, based on which an ‘expected’ heat plot was generated. The ‘observed’ heat-plot  
141 was then compared visually with the ‘expected’ plot to verify positional fidelity.

### 142 **Evidence of complex vocal mechanism**

143 The temporal arrangement of notes in phrases was analysed based on the inter-note time  
144 interval. The inter-note interval is the duration between the offset of one note to the onset of  
145 the subsequent note within a phrase. We analysed inter-note interval position up to 20  
146 positions as sample size of phrase comprising of >21 notes were less. These positions were  
147 marked in ascending order. Inter-note interval between prefix and the first note of body was  
148 always marked as 1. In phrases where prefix was absent, marking of inter-note time interval  
149 started from 2. A total of 2654 inter-note time intervals were analysed. To examine the  
150 differences in inter-note interval between different components of a phrase, we categorised  
151 inter-note interval into 3 groups - between prefix and body (PB), within body (B) and within  
152 suffix syllable (SS). This was done for all 241 phrases and the average values for the body  
153 and suffix region (since there would be >3 inter-note interval values in these regions) for a  
154 given phrase was taken for further analyses.

### 155 **Statistical Analysis**

156 Statistical tests were performed in R 4.0.3 (R development core team 2008). Differences in  
157 frequency of occurrence of prefix and suffix syllable in the phrase were tested by  $\chi^2$  test

158 (using `chisq.test` function of the `r` package). We examined the correlation between inter-note  
159 interval and interval position of phrase checked by Pearson's correlation (using `cor.test`  
160 function of the `r` package). Generalised Linear Model (GLM) fitted with Poisson as a family  
161 function (`glm` function of the `r` package) was used to compare inter-note interval between  
162 each note in a phrase. Post-hoc comparison of inter-note interval between 3 categories (PB, B  
163 and SS) was done by Mann-Whitney U (MW U) test (using `wilcox.test` function of the `r`  
164 package).

## 165 **Results**

### 166 **Note classification and song repertoire**

167 Aural-visual analyses of notes resulted in the identification of 23 different notes in the songs  
168 of Purple Sunbird (Table 1). This result was upheld by the Classification and Regression Tree  
169 (CART) analyses which classified notes into 23 terminal nodes with an accuracy of 78.08%.  
170 The first branch of the tree was based on delta time (note duration), which separated 5  
171 smallest notes from the rest of the note types. At each branching the acoustic parameter  
172 responsible for the branching was identified and a total of 22 distinct notes were found  
173 (Figure 1).

174 A total of 30 unique phrase types which were constructed by the iteration of 23 different note  
175 types were found in the song repertoire of Purple Sunbird (Table 2). Accumulation curves  
176 showed that the probability of finding new note is lesser compare to phrase (Figure 2 a and  
177 b).

### 178 **Evidence of phonological syntax**

179 The visual analysis found that each phrase initiated with a single introductory note or  
180 "prefix", followed by series of notes consisting of 2-5 distinct note "phrase body" (Table 2).  
181 In some cases, there were additional notes (up to 3 acoustically distinct notes) at the terminal  
182 end of song phrase that we refer to as "suffix syllable" (Figure 3 a and b). We also found  
183 significant differences in percentage of occurrence of prefix versus suffix within phrases ( $\chi^2 =$   
184 95.12,  $df = 1$ ,  $p < 0.001$ ) wherein prefix occurred in 93% of the phrases analysed whereas  
185 suffix syllable was found in only 27% of phrases (Figure 3 c). It was also found that various  
186 notes were restricted to a certain position ( $\chi^2$  test;  $p < 0.001$ , Table S1) in the song phrase  
187 thereby reject the hypothesis that the notes occur at random order within the phrase. This  
188 implies that there is positional fidelity for notes. Prefix was restricted to note type "M".

189 Whereas, note types J and F and U and N always appear together respectively, forming the  
190 syllables JF and UN. Further, these two syllables were restricted to the suffix region of  
191 phrases. Similarly, note types C, B, D, H and T, R, G were restricted to the initial and  
192 terminal position of the phrase body respectively (Figure 4 a). The 'expected' heatmap shows  
193 that the percentage of occurrence of each note on a specific position is much higher than  
194 predicted by chance alone (Figure 4 b).

### 195 **Evidence of complex vocal mechanism**

196 The average inter-note duration between prefix and initial note of phrase body was  $142 \pm 50$   
197 (standard deviation (SD)) ms and within body was  $63 \pm 15$  (SD) ms. The notes in suffix  
198 syllables were separated by a small inter-note time interval  $14 \pm 4$  (SD) ms. We found that  
199 there is a strong negative correlation between inter-note interval and its position (Pearson  
200 correlation:  $R = -0.54$ ,  $t = -33.30$ ,  $df = 2652$ ,  $p < 0.001$ ) in song phrase i.e., as the song phrase  
201 proceed, there is decrease in silent interval between the notes. This means that notes are  
202 delivered faster towards the end of a phrase. We also found there is significant difference in  
203 the temporal partitioning of notes with respect to its position within a phrase (GLM:  $p <$   
204  $0.001$ ). Significant difference was found in inter-note duration between PB and B (MW U  
205 test:  $W = 14$ ,  $p < 0.001$ ); PB and SS (MW U test:  $W = 300$ ,  $p < 0.001$ ); and between B and SS  
206 (MW U test:  $W = 415$ ,  $p < 0.001$ ) (Figure 5).

### 207 **Discussion**

208 The study provides the evidence for song complexity in terms of number of distinct notes and  
209 phrases in song repertoire, phonological syntax in construction of phrase and sexy-syllable in  
210 the breeding song of male Purple Sunbird. Based on the classical (aural-visual inspection)  
211 method, we found 23 structurally and aurally distinct notes which combine variably to form  
212 30 different phrases. Number of unique notes based on classical classification vs CART  
213 analyses were 23 and 22 respectively. This implies that the results are in agreement with each  
214 other, thereby cross validating the two methods. Further, from accumulation curve, we found  
215 that the probability of finding new phrase is more compare to note. This is because phrases  
216 are constructed by iteration of existing notes and deletion and addition of note to the existing  
217 phrase result in addition of new phrase in the repertoire (Kroodsma 1977).

218 The presence of 30 different phrases in the breeding song repertoire of Purple Sunbird is  
219 relatively large when compared to other passerines 12 in Song sparrow (Hiebert et al. 1989),  
220 12 in Chestnut-sided warbler (Byers 1995) and 4 in Great tit (McGregor et al. 1981). It is



221 very likely that the size of song repertoire changes with individual as genetic, environmental,  
222 and cultural factors have great impact on the vocal performance of an individual (Nowicki et  
223 al. 2002; Reid et al. 2004; Roper and Zann 2006). Moreover, each song phrase of Purple  
224 Sunbird is found to be composed of 2-10 structurally and aurally distinct notes and the  
225 number of notes within a phrase varies from 3-24. According to Kroodsma 1977, song  
226 complexity depends upon number of distinct song component (note) within a song type  
227 (phrase) and in males Chaffinches complex song phrases with larger number of trills are  
228 selected by females (Leitão et al. 2006).

229 The song phrases of Purple Sunbird are composed of introductory note followed by series of  
230 notes arranged in stereotypic pattern (body) and later terminated by terminal trill (suffix).  
231 Moreover, each phrase type has fixed sequence of notes with occasional variation of addition  
232 or deletion of a note type. Thus, the syntax in Purple Sunbird song phrase is phonological  
233 than combinatorial, since the phrases themselves do not have a definite meaning and are  
234 composed of meaningless units, notes (Berwick et al. 2011). The entire song, composed of  
235 multiple repetition of phrases is used as a vocal display. Furthermore, the introductory note is  
236 a single note which is more comparable to that of single introductory whistle in the songs of  
237 male White-crowned Sparrows (Phuget sound) and Hermit Thrush (Roach et al. 2012; Nelson  
238 and Soha 2004) than to the series of introductory notes in the song of Zebra finches (Williams  
239 2004). Introductory note in many species is a stereotypic note that occur at the onset of song  
240 or song phrase (Roach et al. 2012, Nelson and Soha 2004; Williams 2004) and is consistent in  
241 the song of Purple Sunbird as 93% of song phrase are initiated with an introductory note and  
242 was a stereotype note 'M'.

243 We found that inter-note interval reduced from the start to end of a phrase. The prefix was  
244 observed to appear much earlier in the phrase, since inter-note time interval between prefix  
245 and first note of phrase body was 142 ms, whereas that of notes within phrase body was 63  
246 ms. In suffix, within a 2-note syllable, each note (with different frequencies) was separated  
247 by a very small-time interval of 14 ms. Syllables comprising of multiple notes with such  
248 small inter-note interval, known as a mini-breath, are referred to as 'sexy syllable' (Garcia-  
249 Fernandez et al. 2013). It has been reported that females of the domestic Canary prefer males  
250 as mates which were able to incorporate two-note (each different frequency) syllables  
251 (separated by mini-breaths) into their songs (Garcia-Fernandez et.al 2013). Further, Suthers et  
252 al. (2004) reported that sexy syllables are hard to produce, which correlate with our findings  
253 as suffix syllables are present only in 27% of phrases. Thus, we speculate that suffix syllables

254 (JF and UN) are also likely to be sexy syllables in Purple Sunbird. This, however, remains to  
255 be tested.

256 In conclusion, our findings revealed the presence of a large repertoire size in Purple Sunbird,  
257 in which phrase construction follows certain rules or phonological syntax. We also showed  
258 the presence of mini-breaths in song syllables. These results suggested that vocal  
259 communication in the Purple Sunbird is complex. Increase in complexity in vocalizations  
260 may also arise from variation in dialects owing to location or even seasonal variation. For  
261 instance, variation in songs based on individual and location has been reported in Song  
262 Sparrow (Harris and Lemon 1972), White-crown Sparrow (Nelson 2000) and Phuket Sound  
263 White-crown Sparrow (Nelson and Soha 2004). Whereas in free-ranging Canaries, song  
264 composition changes with season even though overall number of elements (notes/syllable)  
265 remain the same (Voigt et al. 2001). Studies also suggest that complexity in vocalizations is  
266 directly proportional to sexual attractiveness (Eriksson and Wallin 1986; Gil and Slater 2000)  
267 or is important in male-male competition (Ten Cate et al. 2002). Based on our findings,  
268 further studies can be carried-out in Purple Sunbird, as it is broadly distributed and is non-  
269 migratory in the tropics and subtropics region (Ali and Ripley 1983). Further, distinct sexual  
270 dimorphism during the breeding season also makes it an efficient system to study seasonal  
271 changes in the song repertoire.

272

### 273 **Acknowledgements**

274 We thank IISER Mohali for infrastructural support. Both authors benefitted from several  
275 discussions during the poster session of IBAC 2017 where the initial results of the work were  
276 presented. Towards this we thank the organizers for arranging the conference in India,  
277 making it possible for many Indian students including the first author to attend it and benefit  
278 from discussion with an international audience.

279

### 280 **Ethical Statement**

281 The study was carried out in the field and was purely observational. No animals were  
282 captured or harmed in anyway during the study.

283

284 **Declaration of Interest Statement**

285 Authors declare no conflict of interest.

286

287 **Funding**

288 The recorders used for the project was purchased from funding received from DST-SERB  
289 grant (YSS/2015/001606) to MJ. SC was supported by a Senior Research Fellowship from  
290 UGC.

291

292 **References**

- 293 1. Ali S, Ripley SD. 1983. Handbook of the birds of India and Pakistan.
- 294 2. Berwick RC, Okanoya K, Beckers GJ, Bolhuis JJ. 2011. Songs to syntax: the  
295 linguistics of birdsong. *Trends Cogn Sci.* 15:113-121.
- 296 3. Blumstein DT, Armitage KB. 1997. Does sociality drive the evolution of  
297 communicative complexity? A comparative test with ground-dwelling sciurid alarm  
298 calls. *Am Nat.* 150:179-200.
- 299 4. Breiman L, Friedman J, Olshen R, Stone C. 1984. Classification and regression trees.  
300 Wadsworth Int Group. 37:237-251.
- 301 5. Byers BE. 1995. Song types, repertoires and song variability in a population of  
302 chestnut-sided warblers. *Condor* 97:390–401.
- 303 6. Engesser S, Ridley AR, Townsend SW. 2016. Meaningful call combinations and  
304 compositional processing in the southern pied babbler. *Proc Natl Acad Sci.* 113:5976-  
305 5981.
- 306 7. Eriksson D, Wallin L. 1986. Male bird song attracts females - a field  
307 experiment. *Behav Ecol Sociobiol.* 19:297-299.
- 308 8. Galili, Tal, O'Callaghan, Alan, Sidi, Jonathan, Sievert, Carson. 2017. "heatmaply: An  
309 R package for creating interactive cluster heatmaps for online publishing."  
310 *Bioinformatics.*
- 311 9. Garcia-Fernandez V, Draganoiu TI, Ung D, Lacroix A, Malacarne G, Leboucher G.  
312 2013. Female canaries invest more in response to an exaggerated male trait. *Anim*  
313 *behave.* 85:679-684.

- 314 10. Garland EC, Castellote, M, Berchok, CL. 2015. Beluga whale (*Delphinapterus leucas*)  
315 vocalizations and call classification from the eastern Beaufort Sea population. J  
316 Acoust Soc Am. 137:3054-3067.
- 317 11. Gil D, Slater PJ. 2000. Multiple song repertoire characteristics in the willow warbler  
318 (*Phylloscopus trochilus*): correlations with female choice and offspring  
319 viability. Behav Ecol Sociobiol. 47:319-326.
- 320 12. Gustison ML, le Roux A, Bergman TJ. 2012. Derived vocalizations of geladas  
321 (*Theropithecus gelada*) and the evolution of vocal complexity in primates. Philos.  
322 Trans R Soc Lond B Biol Sci. 367:1847-1859.
- 323 13. Hailman JP, Ficken MS. 1986. Combinatorial animal communication with  
324 computable syntax: Chick-a-dee calling qualifies as " language" by structural  
325 linguistics. Anim Behav.
- 326 14. Harris MA, Lemon RE. 1972. Songs of song sparrows (*Melospiza melodia*):  
327 individual variation and dialects. Can J Zool. 50:301-309.
- 328 15. Hiebert SM, Stoddard PK, Arcese P. 1989. Repertoire size, territory acquisition and  
329 reproductive success in the song sparrow. Anim Behav. 37:266-273.
- 330 16. Kottek M, Grieser J, Beck C, Rudolf B, Rubel F. 2006. World map of the Köppen-  
331 Geiger climate classification updated. Meteorol Z. 15:259-263.
- 332 17. Kroodsma DE. 1977. Correlates of song organization among North American  
333 wrens. Am Nat. 111:995-1008.
- 334 18. Leitão A, Ten Cate C, Riebel K. 2006. Within-song complexity in a songbird is  
335 meaningful to both male and female receivers. Anim Behav. 71:1289-1296.
- 336 19. McComb K, Semple S. 2005. Coevolution of vocal communication and sociality in  
337 primates. Biol Lett. 1:381-385.
- 338 20. McGregor PK, Krebs JR, Perrins CM. 1981. Song repertoires and lifetime  
339 reproductive success in the great tit (*Parus major*). Am Nat. 118:149-159.
- 340 21. Nelson DA. 2000. Song overproduction, selective attrition and song dialects in the  
341 white-crowned sparrow. Anim Behav. 60:887-898.
- 342 22. Nelson DA, Soha JA. 2004. Perception of geographical variation in song by male  
343 Puget Sound white-crowned sparrows, *Zonotrichia leucophrys pugetensis*. Anim  
344 Behav. 68:395-405.
- 345 23. Nowicki S, Searcy WA, Peters S. 2002. Quality of song learning affects female  
346 response to male bird song. Proc Biol Sci. 269:1949-54.

- 347 24. Range F, Fischer J. 2004. Vocal repertoire of sooty mangabeys (*Cercocebus torquatus*  
348 *atys*) in the Taï National Park. *Ethology*. 110:301-321.
- 349 25. Reid JM, Arcese P, Cassidy AL, Hiebert SM, Smith JN, Stoddard PK, Keller LF.  
350 2004. Song repertoire size predicts initial mating success in male song sparrows,  
351 *Melospiza melodia*. *Anim Behav*. 68:1055-1063.
- 352 26. Roach SP, Johnson L, Phillmore LS. 2012. Repertoire composition and singing  
353 behaviour in two eastern populations of the Hermit Thrush (*Catharus*  
354 *guttatus*). *Bioacoustics*. 21:239-252.
- 355 27. Roper A, Zann R. (2006). The onset of song learning and song tutor selection in  
356 fledgling zebra finches. *Ethology*. 112:458-70.
- 357 28. Searcy WA. 1992. Song repertoire and mate choice in birds. *Am Zool*. 32:71-80.
- 358 29. Singh M, Jaiswal A, Ulman Y, Kumar, K. 2019. Vocal Adjustments in Purple Sunbird  
359 (*Cinnyris asiaticus*) at Noisy Habitats. *Acta Acust united Ac*. 105:294-300.
- 360 30. Suthers RA. 2004. How birds sing and why it matters. *Nature's music: the science of*  
361 *birdsong*. Elsevier Academic Press, San Diego. 272-295.
- 362 31. Suthers RA, Vallet E, Kreutzer M. 2012. Bilateral coordination and the motor basis of  
363 female preference for sexual signals in canary song. *J. Exp. Biol*. 215:2950-2959.
- 364 32. Suzuki TN, Wheatcroft D, Griesser M. 2016. Experimental evidence for  
365 compositional syntax in bird calls. *Nat commun*. 7:10986.
- 366 33. Ten Cate C, Slabbekoorn H, Ballintijn MR. 2002. Birdsong and male—male  
367 competition: causes and consequences of vocal variability in the collared dove  
368 (*Streptopelia decaocto*). *ADV STUD BEHAV*. 31:31-75.
- 369 34. Therneau T, Atkinson B, Ripley B, Ripley MB. 2018. package 'rpart.' R package  
370 version 4.1-13.
- 371 35. Voigt C, Leitner S, Gahr M. 2001. Seasonal changes in the song pattern of the non-  
372 domesticated island canary (*Serinus canaria*) a field study. *Behaviour*. 138:885-904.
- 373 36. Williams H. 2004. Birdsong and singing behavior. *Ann N Y Acad Sci*. 1-30.

374

375

376 **Figure legends**

377 Figure 1. Classification of notes obtained from CART. The variables used at each split in the  
378 tree are listed, along with the criteria (<, >, or =). ND = note duration, F5 = frequency 5%,  
379 F95 = frequency 95%, BW90 = bandwidth 90% and PF = peak frequency. Right side of split  
380 agrees the criteria of splitting variable and left side does not agree. The terminal node  
381 represents the final classification of tree along with proportion of correctly classified values.  
382

383 Figure 2. **a.** line plot and **b.** logarithmic curve showing accumulation of phrase and notes  
384 across 241 phrases sampled.

385

386 Figure 3. A representative song phrase of Purple sunbird; **a.** Phrase with prefix (P) and  
387 body(B); and **b.** Phrase with prefix (P), body (B) and suffix (S). **c.** Percentage of occurrence  
388 of prefix and suffix in song phrase. \* represent significant difference.

389

390

391 Figure 4 **a.** and **b.** Heat plots representing the percentage of occurrence of each note at  
392 specific positions within the phrase body: observed and expected respectively. Different color  
393 shades represent the percentage of occurrence of a note at a particular location in song  
394 phrases. P represent prefix, B represent body and S represent suffix. Numerical values along  
395 with B and S in x-axis represent position in ascending order,

396

397 Figure 5. **a.** Distribution of inter-note interval within the song phrase of Purple Sunbird.  
398 Black dot represents mean and bar represents Standard Deviation. Grey dots show  
399 distribution of each data point. PB is inter-note interval between prefix and first note of  
400 phrase body, B is within body and S is within suffix inter-note interval. **b.** Violin plots  
401 representing differences in inter-note interval between prefix-body (PB), within body (B) and  
402 between suffix syllable (SS). The marker represents median, box represent interquartile range  
403 and spread is confident interval (0.95) in the plot. The shape of violin display distribution of  
404 each data point. \* represent significant different.

405

406

407 **Tables**

408 Table 1. Mean  $\pm$  SD of 5 acoustic parameters for 23 notes obtained in the vocalization of  
 409 Purple sunbird. N corresponds to sample size.

| S.No | Note ID | N   | Note duration (s) | Frequency 5% (kHz) | Frequency 95% (kHz) | Bandwidth 90% (kHz) | Peak frequency (kHz) |
|------|---------|-----|-------------------|--------------------|---------------------|---------------------|----------------------|
| 1    | A       | 249 | 0.17 $\pm$ 0.01   | 4.00 $\pm$ 0.20    | 5.68 $\pm$ 0.26     | 1.68 $\pm$ 0.37     | 4.98 $\pm$ 0.36      |
| 2    | B       | 64  | 0.15 $\pm$ 0.02   | 5.65 $\pm$ 0.23    | 7.05 $\pm$ 0.14     | 1.40 $\pm$ 0.24     | 6.90 $\pm$ 0.17      |
| 3    | C       | 24  | 0.19 $\pm$ 0.01   | 4.96 $\pm$ 0.10    | 6.04 $\pm$ 0.15     | 1.08 $\pm$ 0.15     | 5.65 $\pm$ 0.21      |
| 4    | D       | 267 | 0.07 $\pm$ 0.01   | 4.98 $\pm$ 0.24    | 6.67 $\pm$ 0.31     | 1.69 $\pm$ 0.38     | 6.12 $\pm$ 0.42      |
| 5    | E       | 165 | 0.14 $\pm$ 0.01   | 5.02 $\pm$ 0.07    | 6.91 $\pm$ 0.08     | 1.89 $\pm$ 0.09     | 5.63 $\pm$ 0.74      |
| 6    | F       | 116 | 0.05 $\pm$ 0.01   | 4.51 $\pm$ 0.48    | 7.03 $\pm$ 0.38     | 2.52 $\pm$ 0.41     | 6.47 $\pm$ 0.74      |
| 7    | G       | 90  | 0.15 $\pm$ 0.01   | 4.33 $\pm$ 0.21    | 6.49 $\pm$ 0.14     | 2.16 $\pm$ 0.29     | 4.91 $\pm$ 0.55      |
| 8    | H       | 155 | 0.15 $\pm$ 0.05   | 4.86 $\pm$ 0.31    | 5.70 $\pm$ 0.32     | 0.84 $\pm$ 0.29     | 5.32 $\pm$ 0.32      |
| 9    | I       | 56  | 0.11 $\pm$ 0.01   | 4.11 $\pm$ 0.24    | 6.48 $\pm$ 0.27     | 2.37 $\pm$ 0.22     | 5.56 $\pm$ 0.68      |
| 10   | J       | 115 | 0.04 $\pm$ 0.01   | 3.22 $\pm$ 0.18    | 4.72 $\pm$ 0.41     | 1.49 $\pm$ 0.44     | 3.81 $\pm$ 0.36      |
| 11   | K       | 223 | 0.10 $\pm$ 0.01   | 4.37 $\pm$ 0.20    | 6.49 $\pm$ 0.17     | 2.58 $\pm$ 0.24     | 5.78 $\pm$ 0.96      |
| 12   | L       | 720 | 0.12 $\pm$ 0.01   | 3.69 $\pm$ 0.24    | 6.39 $\pm$ 0.36     | 2.70 $\pm$ 0.40     | 4.86 $\pm$ 0.63      |
| 13   | M       | 249 | 0.05 $\pm$ 0.01   | 4.97 $\pm$ 0.23    | 6.10 $\pm$ 0.37     | 1.13 $\pm$ 0.41     | 5.62 $\pm$ 0.28      |
| 14   | N       | 13  | 0.04 $\pm$ 0.00   | 5.51 $\pm$ 0.23    | 7.20 $\pm$ 0.14     | 1.69 $\pm$ 0.31     | 6.63 $\pm$ 0.23      |
| 15   | O       | 213 | 0.14 $\pm$ 0.01   | 4.54 $\pm$ 0.18    | 6.85 $\pm$ 0.34     | 2.31 $\pm$ 0.35     | 5.29 $\pm$ 0.40      |
| 16   | P       | 33  | 0.07 $\pm$ 0.01   | 3.87 $\pm$ 0.19    | 5.88 $\pm$ 0.31     | 2.02 $\pm$ 0.41     | 4.83 $\pm$ 0.45      |
| 17   | Q       | 16  | 0.09 $\pm$ 0.01   | 3.93 $\pm$ 0.15    | 6.91 $\pm$ 0.16     | 2.98 $\pm$ 0.17     | 6.15 $\pm$ 0.53      |
| 18   | R       | 6   | 0.17 $\pm$ 0.01   | 3.70 $\pm$ 0.09    | 6.23 $\pm$ 0.20     | 2.53 $\pm$ 0.26     | 4.62 $\pm$ 0.35      |
| 19   | S       | 134 | 0.12 $\pm$ 0.01   | 4.31 $\pm$ 0.16    | 6.63 $\pm$ 0.20     | 2.32 $\pm$ 0.30     | 5.61 $\pm$ 0.71      |
| 20   | T       | 75  | 0.12 $\pm$ 0.01   | 4.35 $\pm$ 0.30    | 6.09 $\pm$ 0.34     | 1.73 $\pm$ 0.37     | 5.13 $\pm$ 0.47      |
| 21   | U       | 13  | 0.07 $\pm$ 0.01   | 3.40 $\pm$ 0.10    | 5.43 $\pm$ 0.13     | 2.03 $\pm$ 0.13     | 3.64 $\pm$ 0.05      |
| 22   | V       | 12  | 0.18 $\pm$ 0.01   | 3.24 $\pm$ 0.47    | 6.82 $\pm$ 0.26     | 0.42 $\pm$ 3.57     | 5.56 $\pm$ 0.86      |
| 23   | W       | 14  | 0.12 $\pm$ 0.01   | 4.77 $\pm$ 0.14    | 6.57 $\pm$ 0.10     | 1.80 $\pm$ 0.16     | 5.50 $\pm$ 0.64      |

410

411

412

413 Table 2. Mean  $\pm$  SD of 7 acoustic parameters for 30 phrases obtained in the vocalization of  
 414 Purple sunbird. N corresponds to sample size.

| S.No | Phrase ID   | N  | No. distinct notes | No. Notes | Phrase duration (s) | Note interval (s) | Frequency 5% (kHz) | Frequency 95% (kHz) | Bandwidth 90% (kHz) | Peak frequency (kHz) |
|------|-------------|----|--------------------|-----------|---------------------|-------------------|--------------------|---------------------|---------------------|----------------------|
| 1    | MDOKL       | 53 | 5                  | 14±2      | 2.38 ± 0.42         | 0.07 ± 0.01       | 4.43 ± 0.17        | 6.63 ± 0.14         | 2.2 ± 0.14          | 5.47± 0.35           |
| 2    | MBEIL       | 51 | 5                  | 13±2      | 2.41 ± 0.3          | 0.07 ± 0.03       | 4.3 ± 0.16         | 6.63 ± 0.12         | 2.33 ± 0.18         | 5.27 ± 0.4           |
| 3    | MHA         | 17 | 3                  | 7 ± 2     | 1.71 ± 0.46         | 0.08 ± 0.02       | 4.32 ± 0.23        | 5.88 ± 0.22         | 1.53 ± 0.32         | 5.09± 0.27           |
| 4    | MHAKLGUN    | 19 | 7                  | 16 ± 1    | 2.75 ± 0.19         | 0.06 ± 0.01       | 4.24 ± 0.09        | 6.25 ± 0.10         | 2.01 ± 0.69         | 5.21 ± 0.25          |
| 5    | MHAKLG      | 16 | 6                  | 12 ± 1    | 2.33 ± 0.22         | 0.07 ± 0.01       | 4.23 ± 0.05        | 6.22 ± 0.09         | 1.99 ± 0.1          | 1.91 ± 0.25          |
| 6    | MHS         | 12 | 3                  | 9 ± 1     | 1.46 ± 0.23         | 0.14 ± 0.10       | 4.74 ± 0.10        | 6.21 ± 0.13         | 1.48 ± 0.19         | 5.39 ± 0.29          |
| 7    | MHSJFL      | 10 | 6                  | 16 ± 2    | 2.31 ± 0.29         | 0.10 ± 0.06       | 4.34 ± 0.07        | 6.14 ± 0.08         | 1.8 ± 0.08          | 5.19 ± 0.10          |
| 8    | MHAKPKLG    | 8  | 6                  | 14 ± 3    | 2.31 ± 0.39         | 0.06 ± 0.03       | 4.2 ± 0.36         | 6.22 ± 0.70         | 2.03 ± 0.7          | 5.54 ± 0.85          |
| 9    | MDWTJFL     | 7  | 7                  | 16 ± 1    | 2.31 ± 0.28         | 0.09 ± 0.07       | 4.34 ± 0.07        | 6.14 ± 0.08         | 1.80 ± 0.08         | 5.18 ± 0.10          |
| 10   | MHAK        | 5  | 4                  | 7 ± 1     | 1.55 ± 0.17         | 0.08 ± 0.01       | 4.30 ± 0.09        | 6.09 ± 0.13         | 1.76 ± 0.13         | 5.30 ± 0.39          |
| 11   | MBE         | 5  | 3                  | 4 ± 1     | 0.73 ± 0.13         | 0.12 ± 0.01       | 5.26 ± 0.10        | 6.78 ± 0.21         | 1.52 ± 0.23         | 6.04 ± 0.34          |
| 12   | HR          | 4  | 2                  | 10 ± 3    | 2.11 ± 0.39         | 0.07 ± 0.01       | 4.12 ± 0.23        | 5.76 ± 0.02         | 1.64 ± 0.22         | 5.01 ± 0.22          |
| 13   | CTJFL       | 5  | 5                  | 14 ± 3    | 2.44 ± 0.39         | 0.07 ± 0.01       | 4.47 ± 0.09        | 6.07 ± 0.06         | 1.60 ± 0.04         | 5.41 ± 0.17          |
| 14   | MGQLJFL     | 4  | 6                  | 23 ± 2    | 2.88 ± 0.23         | 0.05 ± 0.00       | 4.17 ± 0.09        | 6.33 ± 0.07         | 2.16 ± 0.11         | 5.33 ± 0.13          |
| 15   | MDGJFL      | 4  | 6                  | 22 ± 1    | 2.67 ± 0.18         | 0.05 ± 0.00       | 4.24 ± 0.11        | 6.24 ± 0.10         | 2.00 ± 0.02         | 5.17 ± 0.19          |
| 16   | MBEILJFL    | 3  | 7                  | 22 ± 1    | 3.40 ± 0.32         | 0.05 ± 0.00       | 4.91 ± 0.05        | 6.38 ± 0.11         | 2.19 ± 0.06         | 5.43 ± 0.38          |
| 17   | MDOK        | 3  | 4                  | 9 ± 2     | 1.53 ± 0.41         | 0.07 ± 0.00       | 4.87 ± 0.15        | 6.76 ± 0.06         | 1.89 ± 0.21         | 5.81 ± 0.03          |
| 18   | CT          | 3  | 2                  | 8 ± 1     | 1.83 ± 0.29         | 0.09 ± 0.02       | 4.74 ± 0.10        | 6.91 ± 0.10         | 1.45 ± 0.18         | 5.49 ± 0.24          |
| 19   | MHAKLTJFL   | 3  | 8                  | 21 ± 4    | 2.90 ± 0.37         | 0.06 ± 0.00       | 4.21 ± 0.06        | 6.05 ± 0.02         | 1.84 ± 0.06         | 5.16 ± 0.19          |
| 20   | HJFL        | 2  | 5                  | 21        | 3.4                 | 0.05              | 4.06               | 5.97                | 1.92                | 5.37                 |
| 21   | MHAKLGUNI   | 2  | 9                  | 17        | 2.81                | 0.06              | 4.25               | 6.31                | 2.06                | 5.21                 |
| 22   | MDOKLJFL    | 1  | 7                  | 18        | 2.91                | 0.07              | 4.43               | 6.63                | 2.2                 | 5.47                 |
| 23   | HRJFL       | 1  | 5                  | 15        | 2.65                | 0.06              | 4.19               | 5.79                | 1.6                 | 5.25                 |
| 24   | MHR         | 1  | 3                  | 11        | 2.17                | 0.08              | 4.78               | 5.79                | 1.01                | 5.49                 |
| 25   | MHAKPKLGUNV | 1  | 9                  | 22        | 3.93                | 0.05              | 3.84               | 6.38                | 2.54                | 4.92                 |
| 26   | HAKLGUN     | 1  | 7                  | 16        | 2.65                | 0.06              | 4.31               | 6.18                | 1.87                | 5.09                 |
| 27   | HALKGUNI    | 1  | 8                  | 20        | 3.52                | 0.05              | 4.11               | 6.45                | 2.33                | 5.38                 |
| 28   | MHAKPKLJFL  | 1  | 8                  | 23        | 3.16                | 0.05              | 3.99               | 6.06                | 2.07                | 5.12                 |
| 29   | MHAKLJFL    | 1  | 8                  | 21        | 2.9                 | 0.05              | 4.22               | 5.86                | 1.64                | 4.86                 |
| 30   | MHAKL       | 1  | 5                  | 15        | 2.44                | 0.064             | 4.29               | 5.98                | 1.69                | 5.13                 |





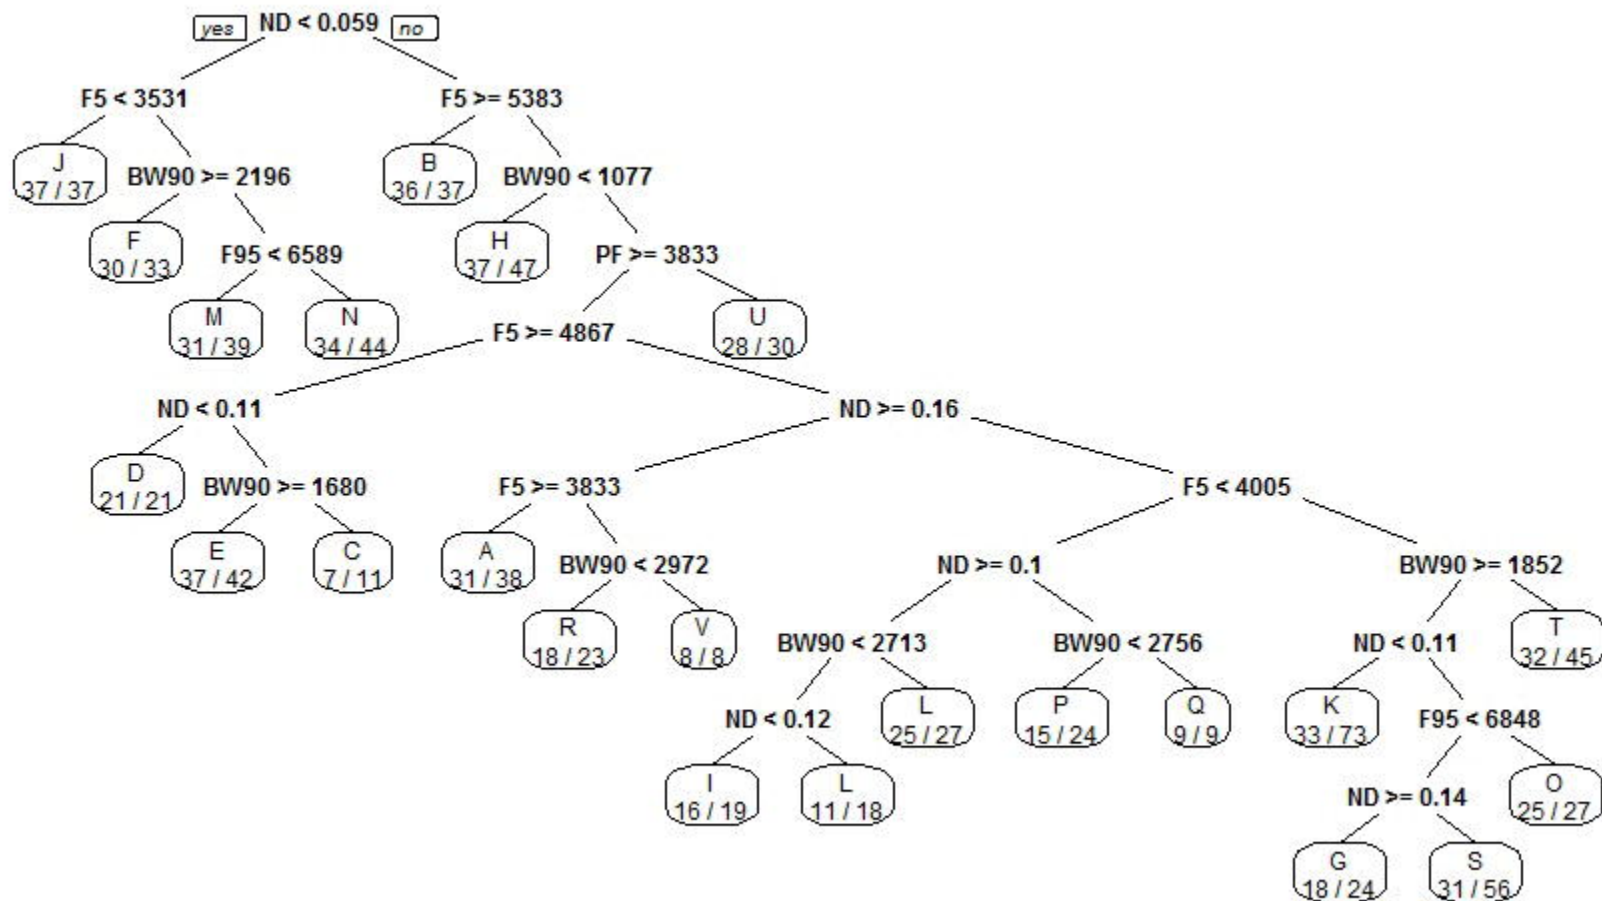

a.

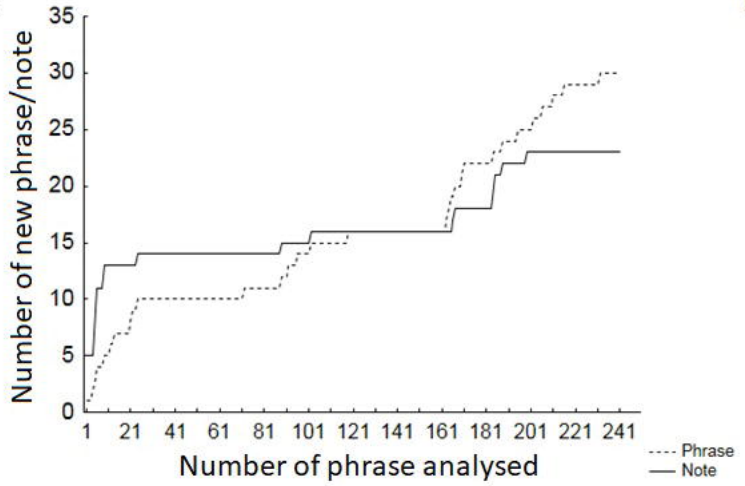

b.

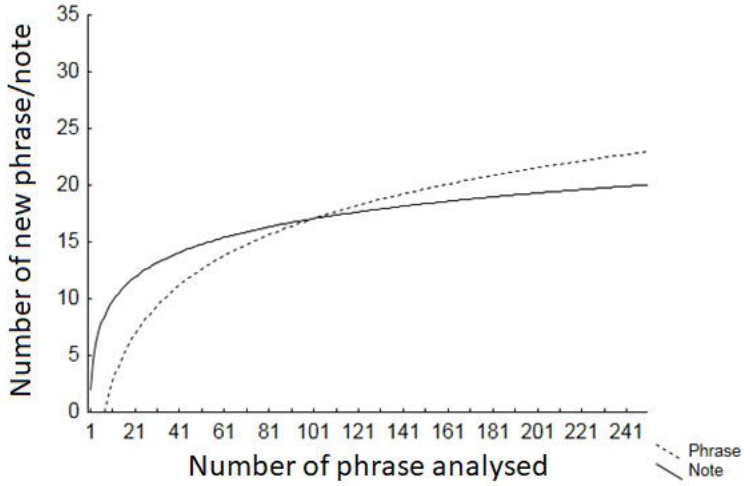

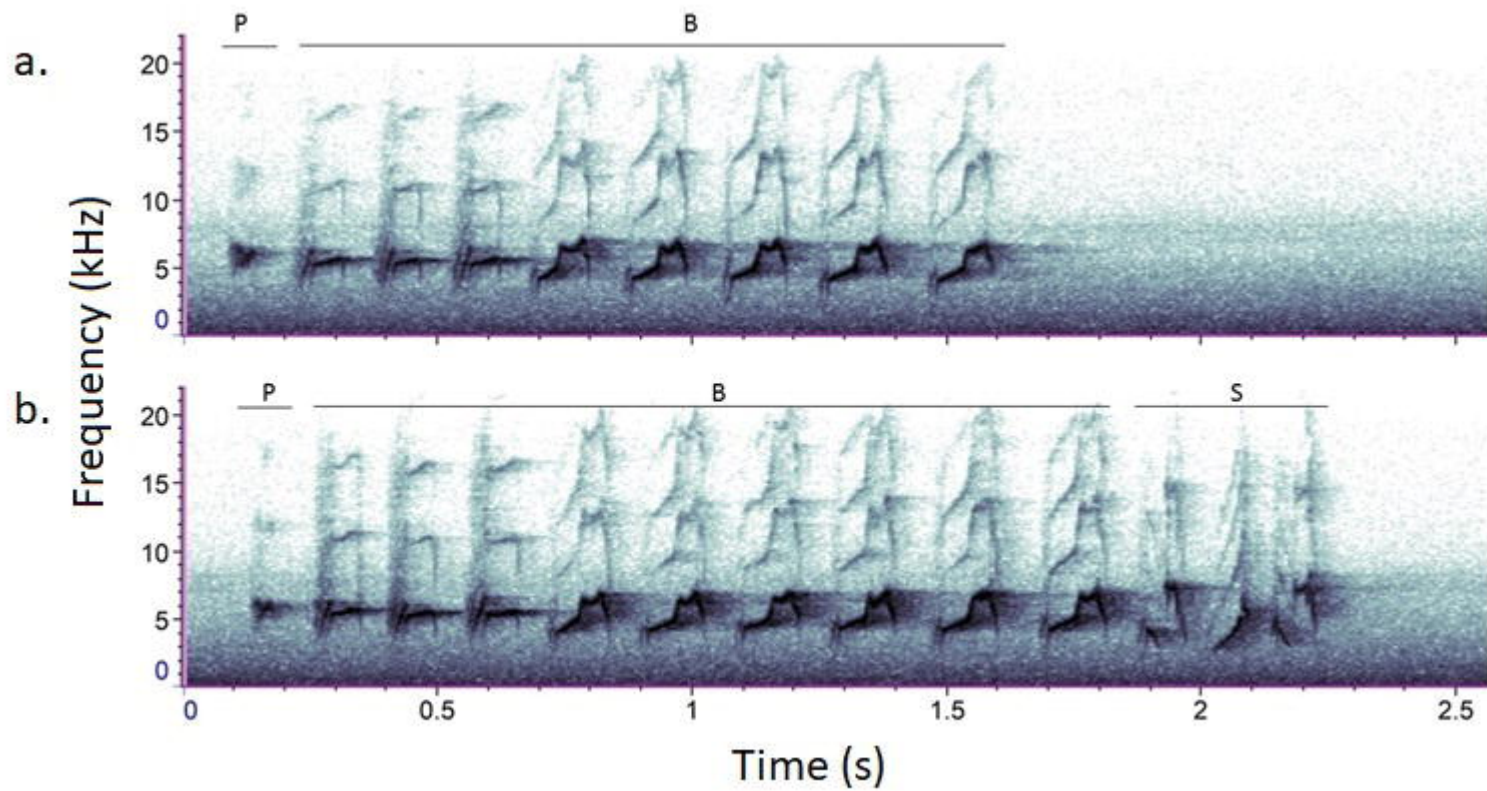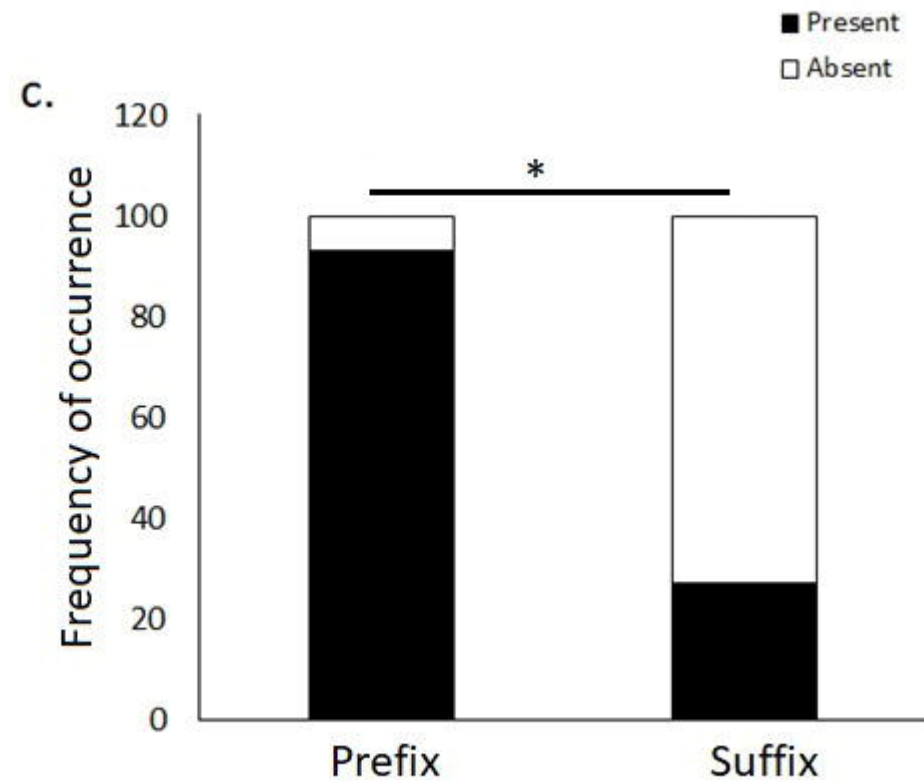

**a.**

Note type

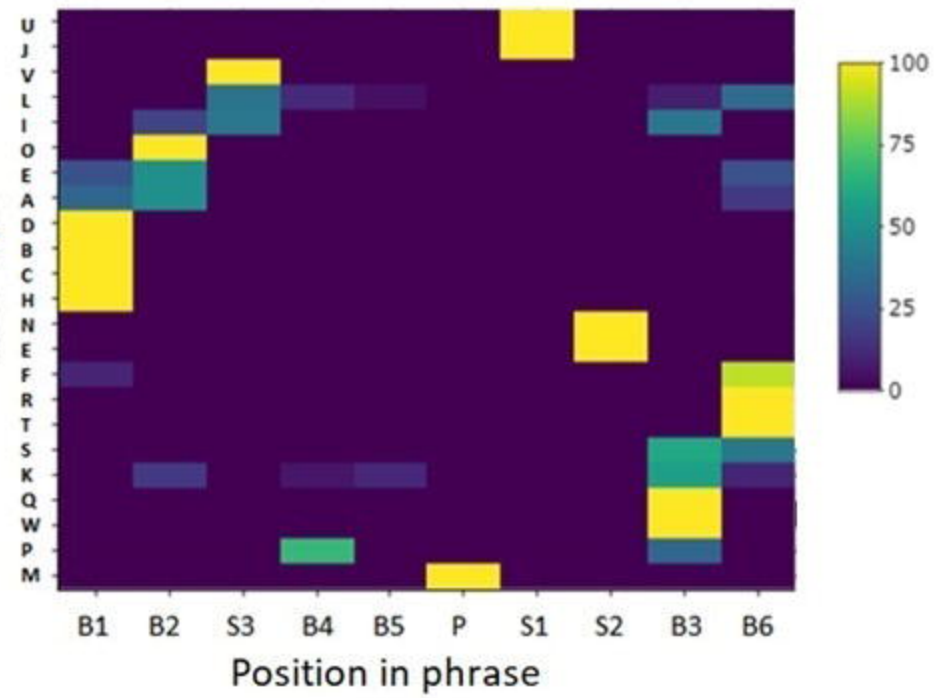**b.**

Note type

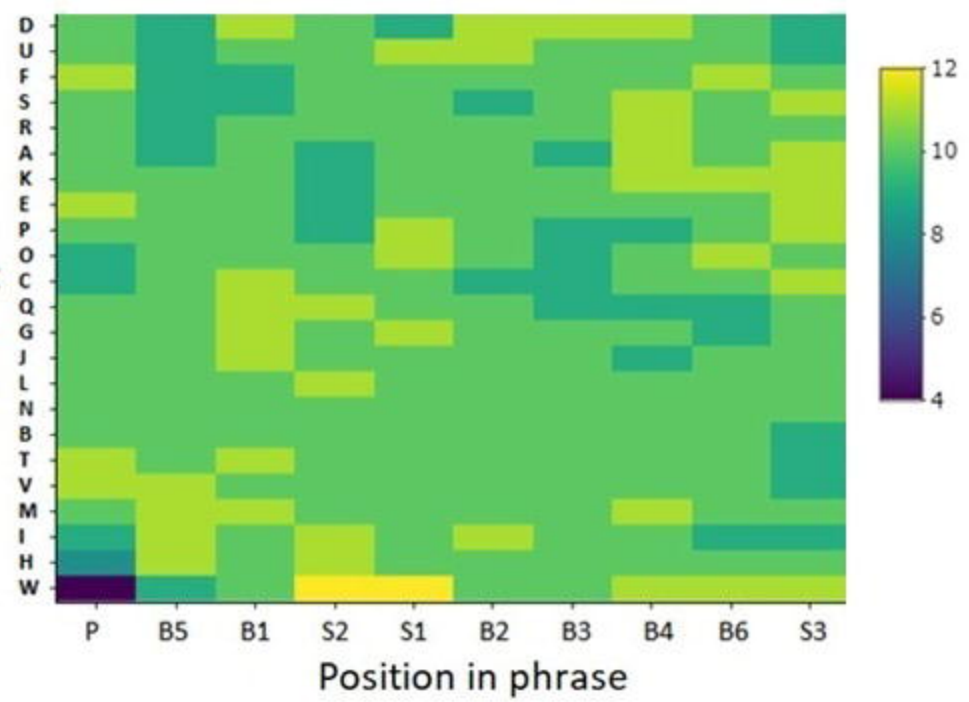

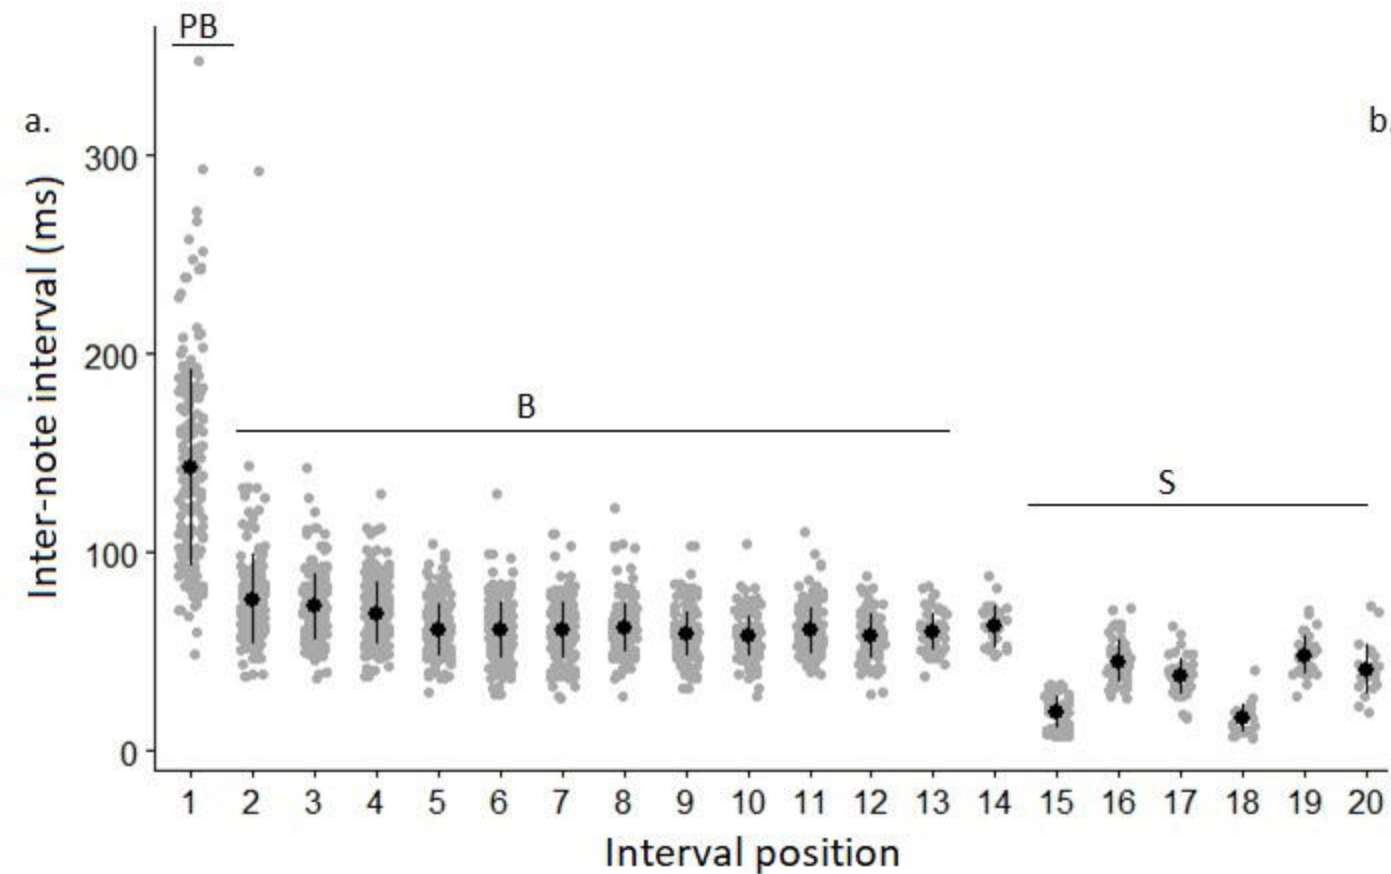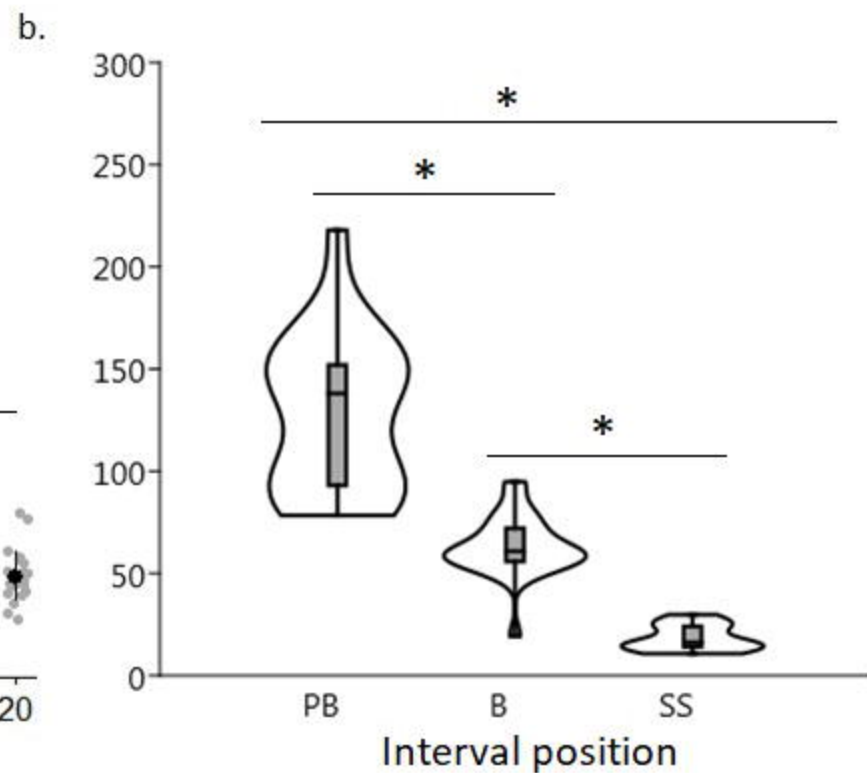

Source: http://biorxiv.org/cgi/content/short/2021.03.20.436261v1.pdf
